# Supplementary material for: Parasite Load and Site-Specific Parasite Pressure as Determinants of Immune Indices in Two Sympatric Rodent Species
Source: MDPI journal article supplement (doi:10.3390/ani9121015), 2019-11-22
Supplement: s1 [file s1]

Supplementary Table S1 Site characteristics. Characteristics and parasite load as determined by *Ixodes ricinus* burden based on data from Hofmeester et al. 2017.

| Site        | Habitat           | Undergrowth vegetation <sup>a</sup> | Coordinates <sup>b</sup>  | Mean <i>I. ricinus</i><br>larval / nymphal<br>burden |
|-------------|-------------------|-------------------------------------|---------------------------|------------------------------------------------------|
| Buunderkamp | Scots pine forest | <i>Vaccinium myrtillus</i>          | 52°00'56''N<br>5°44'50''E | 45.6 / 0.88                                          |
| Herperduin  | Mixed forest      | <i>Molinia caerulea</i>             | 51°45'33''N<br>5°36'53''E | 2.5 / 0.11                                           |
| Maashorst   | Mixed forest      | <i>Deschampsia flexuosa</i>         | 51°42'44''N<br>5°35'24''E | 9.6 / 0.14                                           |
| Stameren    | Mixed forest      | <i>Deschampsia flexuosa</i>         | 52°03'38''N<br>5°21'01''E | 11.4 / 0.46                                          |

<sup>a</sup> The given plant species was the most dominant species in the herbaceous layer in the 1 hectare plot.

<sup>b</sup> Coordinates given are the coordinates as measured with a handheld GPS (Garmin eTrex 20) in the middle of the 1 hectare plot.
