# Supplementary figures and images for: Parasite Load and Site-Specific Parasite Pressure as Determinants of Immune Indices in Two Sympatric Rodent Species
Source: MDPI journal article supplement (doi:10.3390/ani9121015), 2019-11-22

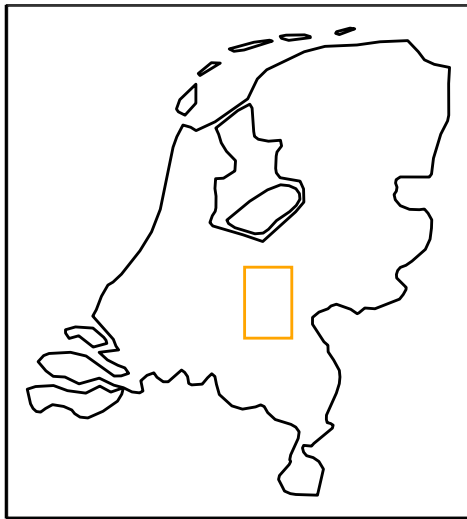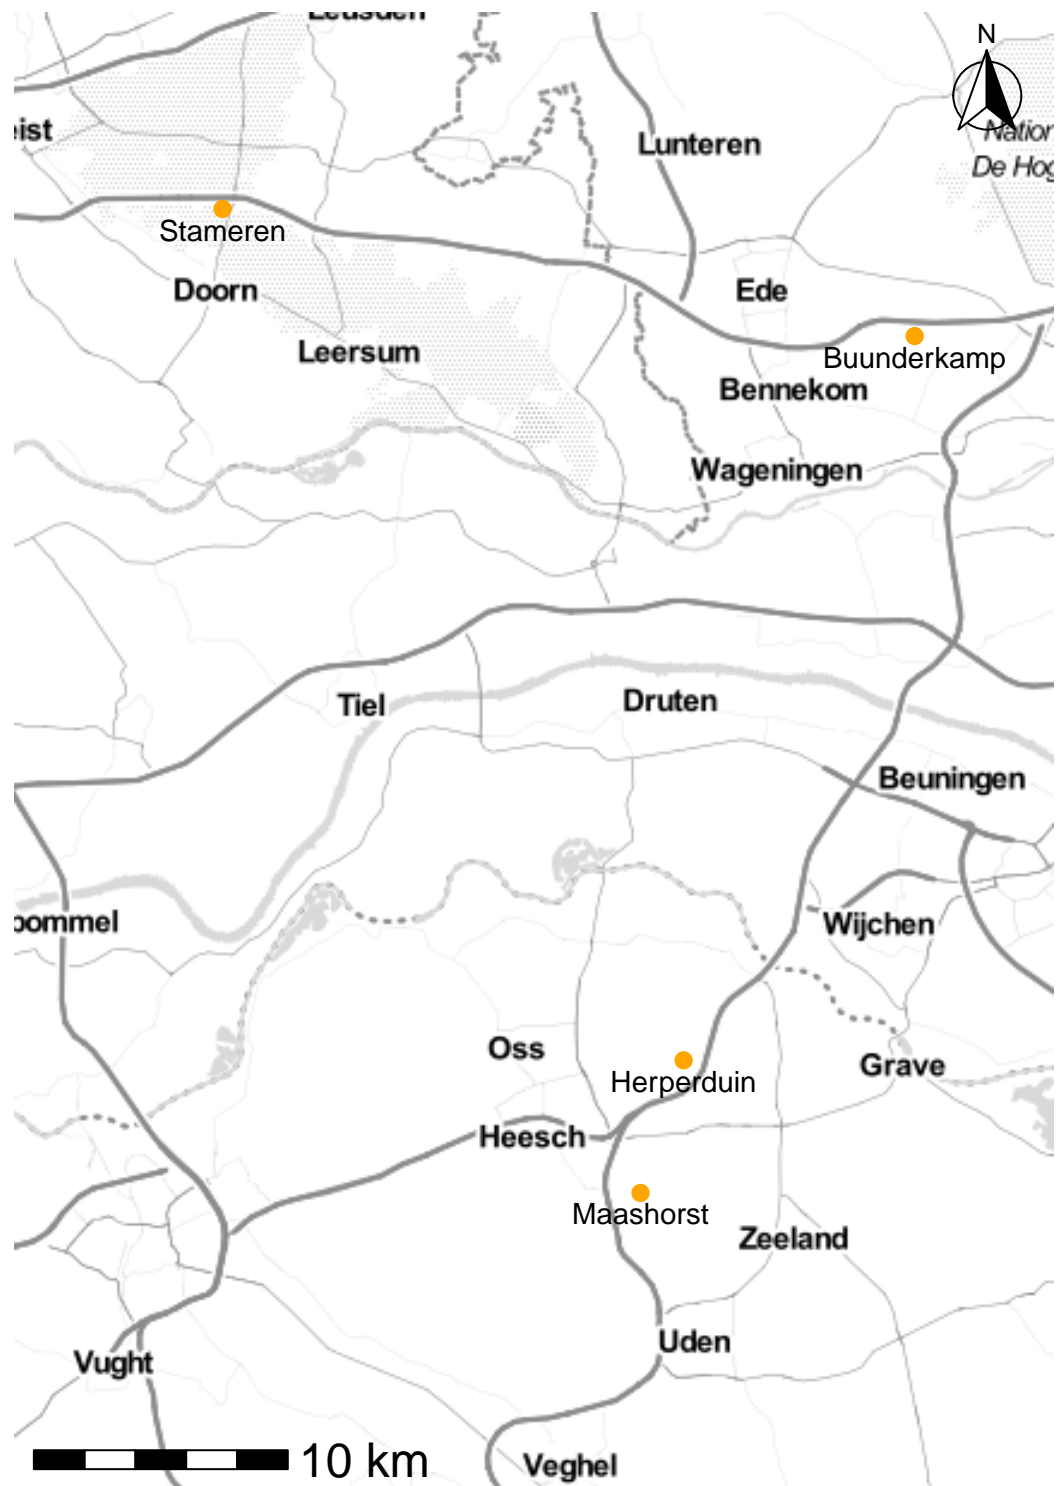

Supplement: s1 [file s1]
